# Supplementary material for: Economic Grand Rounds: Treatment Participation and Medication Adherence: Effects on Criminal Justice Costs of Persons With Mental Illness
Source: Atypon-hosted journal article supplement (doi:10.1176/appi.ps.201400247), 2014-10-01
Supplement: 1189_ds001.pdf [file 1189_ds001.pdf]

Table 1. Multivariable regression of any arrest on prior medication possession and outpatient services utilization<sup>1</sup>

| Characteristic                                                   | Any Arrest |              |      |
|------------------------------------------------------------------|------------|--------------|------|
|                                                                  | OR         | 95% CI       | Sig. |
| <i>Time</i>                                                      |            |              |      |
| Month                                                            | 1.00       | (0.99- 1.00) |      |
| <i>Demographic factors</i>                                       |            |              |      |
| Male                                                             | 2.36       | (1.76- 3.15) | ***  |
| Race/ethnicity, white [Reference]                                | -          | --           | --   |
| Race/ethnicity, black                                            | 1.77       | (1.21- 2.58) | **   |
| Race/ethnicity, Hispanic                                         | 0.99       | (0.66- 1.49) |      |
| Race/ethnicity, other                                            | 0.80       | (0.50- 1.28) |      |
| Age                                                              | 0.99       | (0.98- 1.00) |      |
| <i>Prior arrest</i>                                              |            |              |      |
| Yes                                                              | 4.39       | (3.29- 5.87) | ***  |
| <i>Clinical and treatment factors</i>                            |            |              |      |
| Bipolar diagnosis [Reference]                                    | -          | --           | --   |
| Schizophrenia                                                    | 1.07       | (0.73- 1.56) |      |
| Index hospitalization LOS                                        | 0.99       | (0.97- 1.01) |      |
| 90 day medication compliance post-index hosp, 0 days [Reference] | -          | --           | --   |
| 90 day medication compliance post-index hosp, 1-30 days          | 1.33       | (0.93- 1.90) |      |
| 90 day medication compliance post-index hosp, 31-60 days         | 0.91       | (0.58- 1.41) |      |
| 90 day medication compliance post-index hosp, 61-90 days         | 0.89       | (0.62- 1.27) |      |
| Medication possession 80% or greater (monthly, yes/no)           | 0.80       | (0.65- 0.99) | *    |
| Outpatient services utilized (monthly, continuous)               | 0.98       | (0.95- 1.00) | *    |

<sup>1</sup> Models control for main effect of county

N=1,265 individuals; N=82,503 person-month observations

**Table 2. Monthly mean costs by MPR during 90 days after discharge from index hospitalization**

| Medication possession first 90 days: | 90/90 days <sup>1</sup> |                | 60/90 days <sup>2</sup> |                | 30/90 days <sup>3</sup> |                | 0/90 days <sup>4</sup> |                | All groups estimated total |                |
|--------------------------------------|-------------------------|----------------|-------------------------|----------------|-------------------------|----------------|------------------------|----------------|----------------------------|----------------|
|                                      | Mean                    | Std Dev        | Mean                    | Std Dev        | Mean                    | Std Dev        | Mean                   | Std Dev        | Mean                       | Std Dev        |
| Inpatient                            | \$1,014                 | \$3,702        | \$839                   | \$3,582        | \$948                   | \$3,840        | \$466                  | \$2,491        | <b>\$848</b>               | <b>\$3,672</b> |
| Emergency services                   | \$8                     | \$79           | \$9                     | \$74           | \$12                    | \$89           | \$7                    | \$59           | <b>\$9</b>                 | <b>\$73</b>    |
| Outpatient                           | \$539                   | \$1,678        | \$346                   | \$1,270        | \$243                   | \$1,617        | \$178                  | \$1,155        | <b>\$384</b>               | <b>\$1,913</b> |
| Targeted case management             | \$175                   | \$620          | \$117                   | \$455          | \$133                   | \$777          | \$43                   | \$282          | <b>\$129</b>               | <b>\$640</b>   |
| Psychiatric assessment               | \$20                    | \$100          | \$19                    | \$110          | \$17                    | \$112          | \$13                   | \$98           | <b>\$18</b>                | <b>\$110</b>   |
| Psychiatric medication               | \$443                   | \$426          | \$289                   | \$367          | \$186                   | \$312          | \$82                   | \$216          | <b>\$300</b>               | <b>\$492</b>   |
| Arrest                               | \$65                    | \$449          | \$86                    | \$521          | \$95                    | \$527          | \$100                  | \$540          | <b>\$81</b>                | <b>\$482</b>   |
| Incarceration                        | \$74                    | \$482          | \$106                   | \$590          | \$123                   | \$630          | \$155                  | \$712          | <b>\$105</b>               | <b>\$570</b>   |
| <b>Estimated total average costs</b> | <b>\$2,339</b>          | <b>\$7,535</b> | <b>\$1,810</b>          | <b>\$5,394</b> | <b>\$1,757</b>          | <b>\$5,938</b> | <b>\$1,043</b>         | <b>\$2,477</b> | <b>\$1,872</b>             | <b>\$6,366</b> |

<sup>1</sup> N=637, N=38,671 person-months<sup>2</sup> N=240, N=14,518 person-months<sup>3</sup> N=174, N=10,475 person-months<sup>4</sup> N=316, N=18,839 person-months
